# Supplementary material
Source: PubMed Central journal article supplement (PMC5367258)
Supplement: krnb-14-03-1272745-s001.pdf [file krnb-14-03-1272745-s001.pdf]

## Supplementary material for

### “Viroid quasispecies revealed by deep sequencing”

Rajen J. J. Brass<sup>1</sup>, Robert A. Owens<sup>2</sup>, Jaroslav Matoušek<sup>3</sup>, and Gerhard Steger<sup>1\*</sup>

<sup>1</sup>Institut für Physikalische Biologie, Heinrich-Heine-Universität Düsseldorf, 40204 Düsseldorf, Germany

<sup>2</sup>United States Department of Agriculture, Agricultural Research Service, Molecular Plant Pathology Laboratory, Beltsville, MD 20705, USA

<sup>3</sup>Biology Centre, CAS, v. v. i., Institute of Plant Molecular Biology, Branišovská 31, 37005 České Budějovice, Czech Republic

\*To whom correspondence should be addressed. Tel: +49 211 8114597; Fax: +49 211 8115167;

Email: [steger@biophys.uni-duesseldorf.de](mailto:steger@biophys.uni-duesseldorf.de)

**Table S1: Parameters used in different programs**

| (a) PRINSEQ      |         | (b) TRIMMOMATIC |       | (c) SEGEMEHL |                     |
|------------------|---------|-----------------|-------|--------------|---------------------|
| Variable         | Value   | Variable        | Value | Variable     | Value               |
| -min_len         | 18      | SE              | True  | H            | 1                   |
| -max_len         | 36      | -phred33        | True  | m            | 100                 |
| -ns_max_n        | 0       | ILLUMINACLIP    | 5:5:5 | A            | 80, 85, 90, 95, 100 |
| -lc_method       | entropy | LEADING         | 3     |              |                     |
| -lc_threshold    | 60      | SLIDINGWINDOW   | 4:30  |              |                     |
| -trim_tail_right | 2       | MINLEN          | 18    |              |                     |
| -trim_tail_left  | 6       | AVGQUAL         | 30    |              |                     |

**Table S2: Number of reads mapping to PSTVd variants at 90% and 100% accuracy.**

| Dataset        | Cultivar   | PSTVd     | Count <sup>a</sup> (90%) / 10 <sup>5</sup> | Count <sup>i</sup> (100%) / 10 <sup>5</sup> | Ratio <sup>b</sup> | Ratio <sup>c</sup> |
|----------------|------------|-----------|--------------------------------------------|---------------------------------------------|--------------------|--------------------|
| D <sub>s</sub> | Heinz1706  | AS1       | 7.57                                       | 7.25                                        | 1.04               | } 1.05             |
|                |            | C3        | 9.46                                       | 8.93                                        | 1.06               |                    |
|                |            | QFA→KF5M5 | 1.88                                       | 1.80                                        | 1.04               |                    |
|                |            | QFA       | 1.77                                       | 1.46                                        | 1.22               |                    |
| D <sub>p</sub> | Rutgers    | I         | 5.74                                       | 5.31                                        | 1.08               | } 1.10             |
|                |            | M→Var     | 1.29                                       | 1.16                                        | 1.11               |                    |
|                |            | M         | 1.29                                       | 1.16                                        | 1.11               |                    |
| D <sub>o</sub> | Heinz1706  | RG1       | 7.01                                       | 6.19                                        | 1.13               | } 1.14             |
|                | Moneymaker |           | 4.27                                       | 3.76                                        | 1.14               |                    |
|                | Rutgers    |           | 5.10                                       | 4.34                                        | 1.18               |                    |
|                | UC82B      |           | 3.26                                       | 2.97                                        | 1.10               |                    |

<sup>a</sup> number of reads mapping to the respective PSTVd variant at 90 and 100% accuracy, respectively.

<sup>b</sup> Ratio = count (90%)/count (100%)

<sup>c</sup> mean ratio values; the mean value of the nine ratios is  $1.10 \pm 0.03$ .

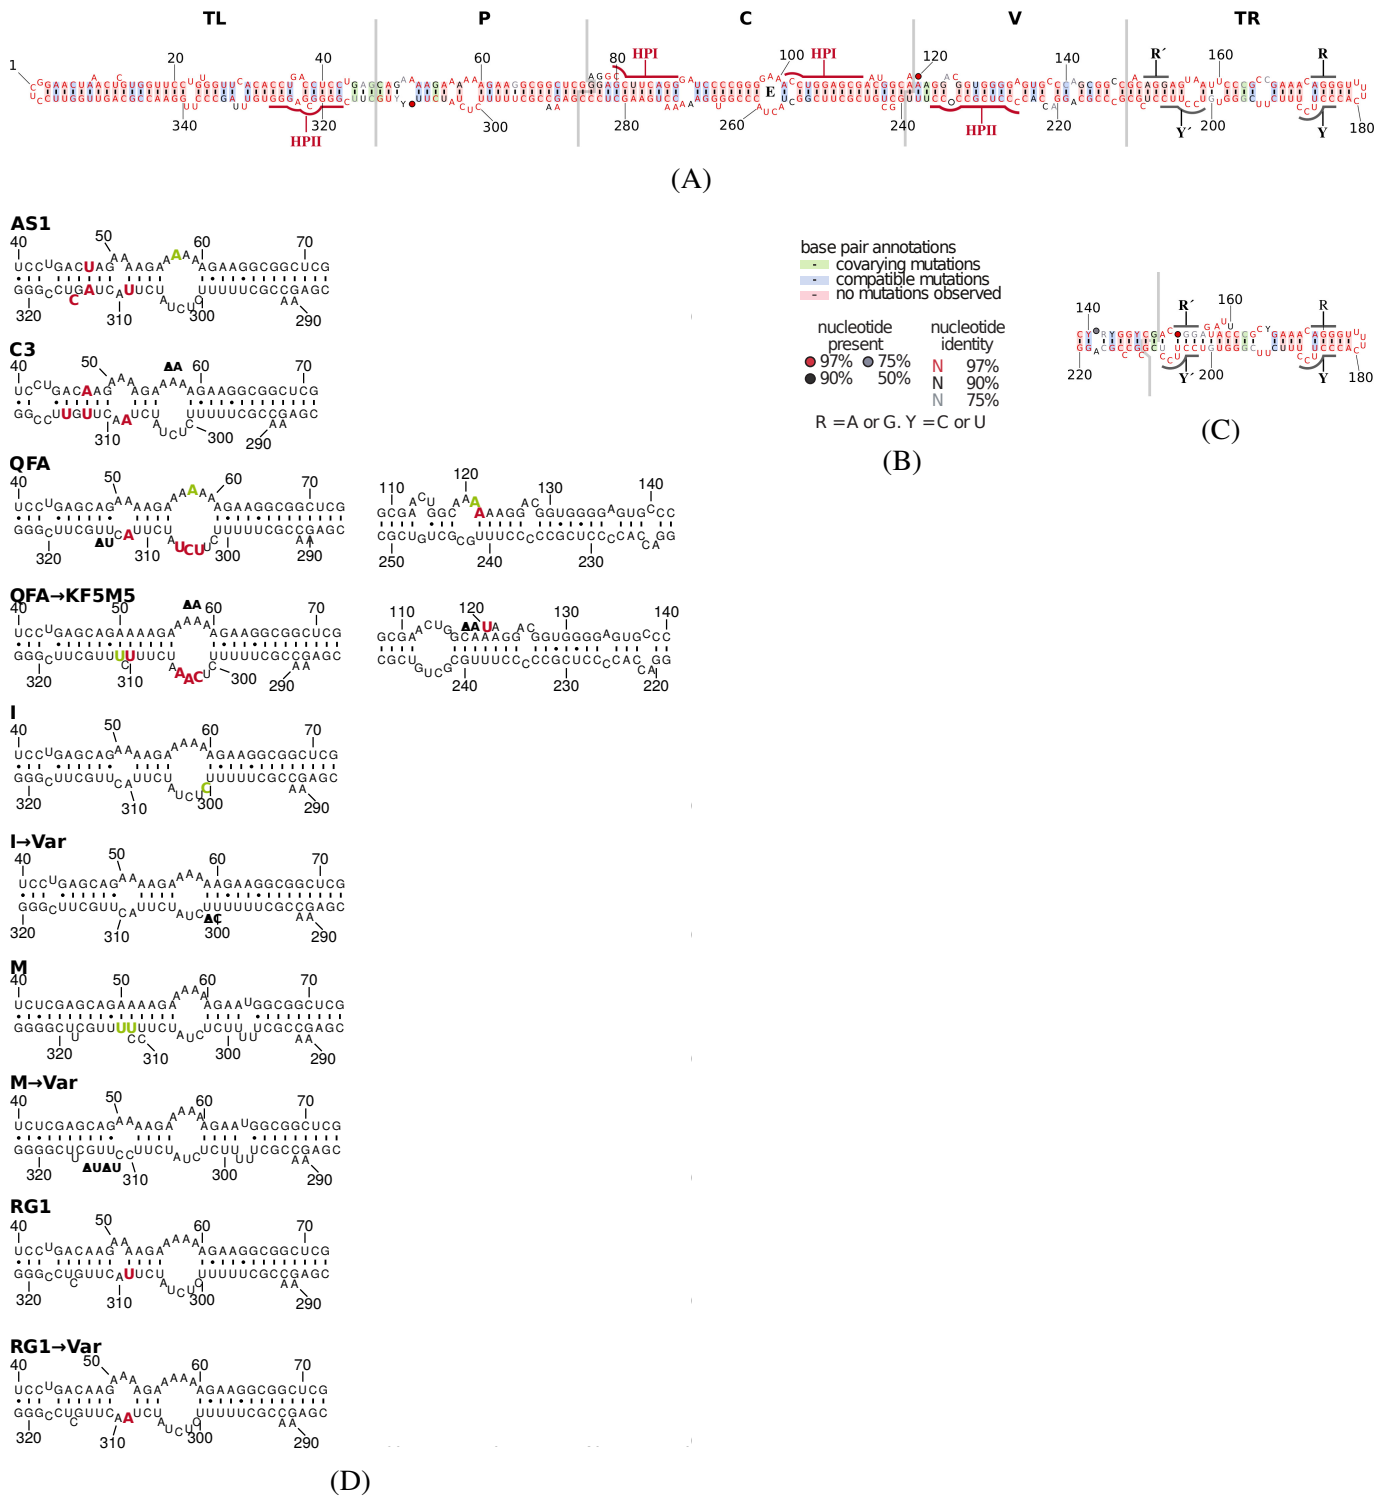

**Figure S1: Structure of (+)-stranded PSTVd variants.** (A) The consensus sequence and structure were predicted for an alignment of 266 variants (see Fig. S4) with CONSTRUCT<sup>1</sup> at 37 °C, excluding lonely base pairs, and drawn with R2R.<sup>2</sup> Borders of the five domains<sup>3</sup> are marked by gray lines (TL, terminal left; P, pathogenicity-related; C, central; V, variable; TR, terminal right). Base pairs on green and blue background are supported by covarying and compatible mutations, respectively; no mutations are observed for basepairs on red background; for further nucleotide annotations see (B). Nucleotides forming the extra-stable hairpins I (HPI) and II (HPII) in thermodynamically metastable structures are outlined. The two RY motifs in the TR critical for binding of the viroid RNA-binding protein VirP1 are outlined and marked by R, R' and Y, Y', respectively.<sup>4</sup> (C) This thermodynamically suboptimal structure of the TR domain emphasizes the similarity in sequence and structure of the two VirP1 binding sites. (D) Selected structural regions of PSTVd variants. Sequence differences between AS1 and C3, QFA and QFA→KF5M5, I and I→var, M and M→var, and RG1 and RG1→var, respectively, are marked in red (mutation), green (insertion), and by ΔN (deletion).

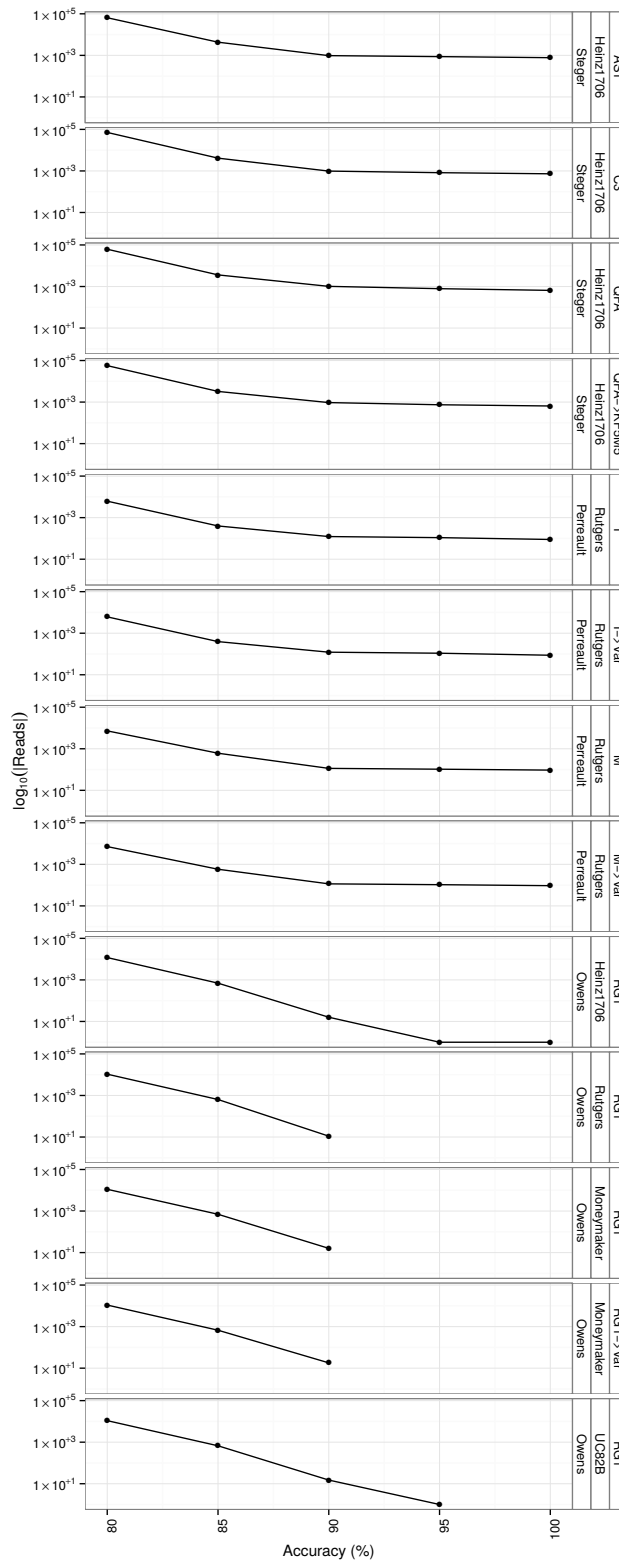

**Figure S2: Mapping of small reads from mock-inoculated plants to the PSTVd variants at different accuracies.**

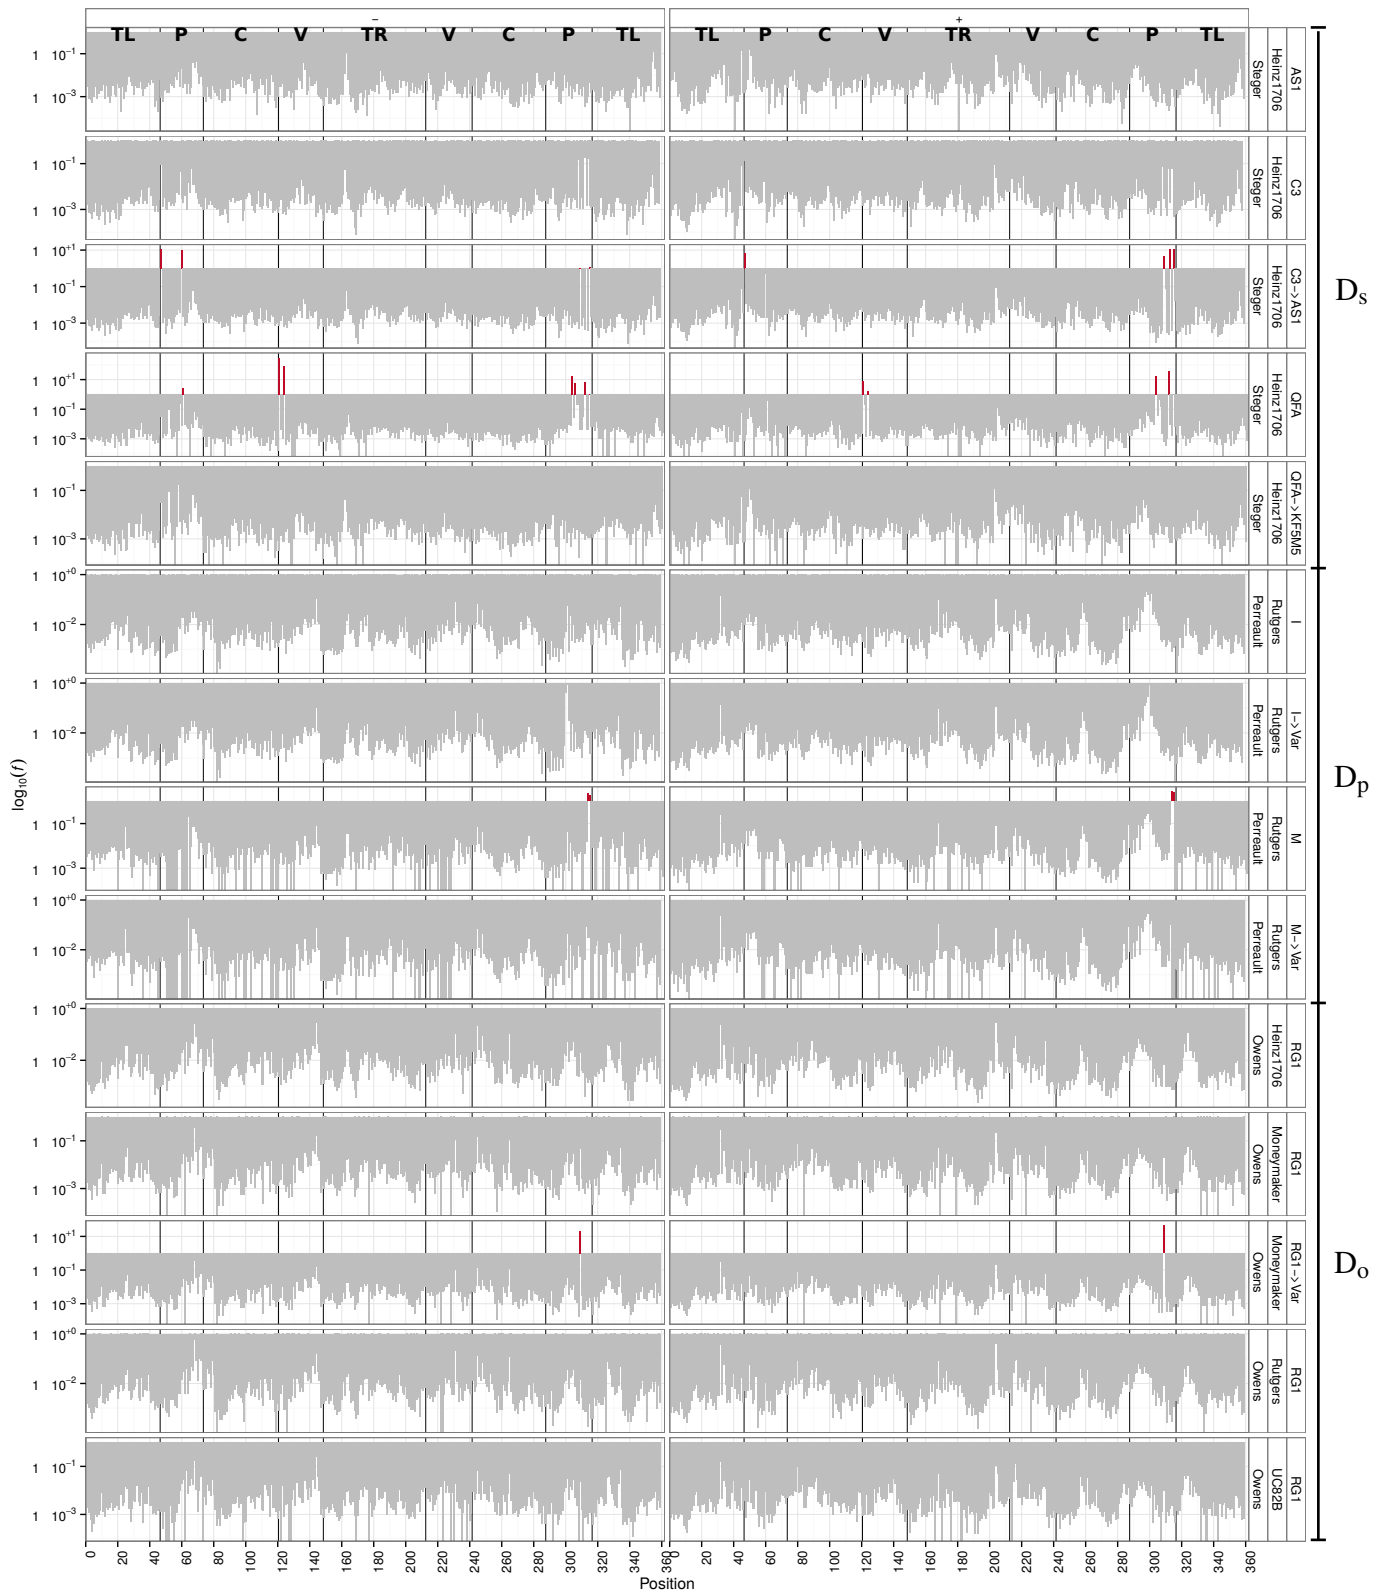

**Figure S3: Ratio of read frequencies with a variant nucleotide relative to those with the reference nucleotide.** Bars in red mark mutations that occur more often than the reference nucleotide, others are shown in gray. The y axis is in a logarithmic scale. Left and right columns show mappings to (–)- and (+)-stranded viroid sequences, respectively.

**Table S3: Calculated error rate for two highly abundant *S. lycopersicum* miRNAs mapped with 90% accuracy.** Due to the high rate of sequencing errors in the flanking positions, only positions 3–17 were considered for calculation of  $P_{\text{error}}$ .

| Dataset        | Condition | Variant | Cultivar   | $P_{\text{error}} / 10^{-4}$ |            |               |
|----------------|-----------|---------|------------|------------------------------|------------|---------------|
|                |           |         |            | sly-miR159                   | sly-miR162 |               |
| D <sub>s</sub> | Healthy   |         |            | 7.00                         | 1.00       | 4             |
|                | Infected  | AS1     | Heinz1706  | 14.8                         | 4.84       | } 7.94 ± 4.23 |
|                |           | C3      |            | 9.39                         | 4.02       |               |
|                |           | QFA     |            | 10.0                         | 4.59       |               |
| D <sub>p</sub> | Healthy   |         |            | 6.00                         | 5.00       | 5.5           |
|                | Infected  | I       | Rutgers    | 6.14                         | 3.97       | } 4.69 ± 1.30 |
|                |           | M       |            | 5.36                         | 3.27       |               |
| D <sub>o</sub> | Healthy   |         | Heinz1706  | 10.0                         | 4.00       | } 6.75 ± 2.55 |
|                |           |         | Moneymaker | 10.0                         | 4.00       |               |
|                |           |         | Rutgers    | 8.00                         | 5.00       |               |
|                |           |         | UC82B      | 8.00                         | 5.00       |               |
|                | Infected  | RG1     | Heinz1706  | 6.81                         | 4.99       | } 6.14 ± 1.97 |
|                |           |         | Moneymaker | 8.33                         | 2.94       |               |
|                |           |         | Rutgers    | 8.05                         | 4.58       |               |
|                |           |         | UC82B      | 8.04                         | 5.41       |               |

**Figure S4: Structural alignment of 266 different PSTVd sequences.** For figure see next page.

PSTVd sequences were retrieved from GenBank via BLAST and search in GenBank definitions in August, 2016. Several sequences had to be modified to fit the standard sequence enumeration and/or reverse complemented; for these sequences, the tags ‘\_mod’ and ‘\_rev’ were added. Identical sequences were removed but their GenBank loci were kept. Partial sequences were removed. The alignment of the remaining 266 unique sequences was performed with MAFFT/X-INS-I.<sup>5</sup> The alignment was drawn by CONSTRUCT.<sup>1</sup> A Vienna-formatted file with aligned sequences is available at [http://www.biophys.uni-duesseldorf.de/~steger/final2supplement\\_motifs.vie](http://www.biophys.uni-duesseldorf.de/~steger/final2supplement_motifs.vie).

Left: the sequence names consist of names as given in GenBank definition and comment plus GenBank ID. The sequence names of variants Intermediate (S8, Int, IDs AY492082, PTVA, NC\_002030), RG1 (IDs PSU23058, DD220185), AS1 (AY518939), C3 (HE575349), KF5M5 (PTVAAA), QFA (Ar74, IDs PSU23059, DQ308560), and Dahlia (AB623143) are highlighted in red.

From top to bottom: borders of the five domains<sup>3</sup> are marked by gray lines (TL, terminal left; P, pathogenicity-related; C, central; V, variable; TR, terminal right). Sequences [with background colors green for loops, red for consensus base pairs, pink for consensus base pair changes (covarying pairs), and white for non-base pairs in paired regions], the consensus sequence, and the consensus structure in bracket-dot notation and character-encoded (both with background colors from white to red proportional to sequence conservation resp. pairing probability).

The “motifs” by which variants QFA and KF5M5 differ from each other are marked by cyan boxes; these motifs, number of PSTVd variants containing the motif, and the motif positions in the alignment are listed in the following table.

| Motif             | #   | Position | Variants                                |
|-------------------|-----|----------|-----------------------------------------|
| 1 GAAAAAA-G       | 239 | 58 – 66  | KF5M3–5, Intermediate, RG1, Dahlia, AS1 |
| GAAAAAAaG         | 5   | 58 – 66  | QFA                                     |
| 2 GGCAAu-AAGG     | 86  | 131 –144 | KF5M3–5                                 |
| GGCAAaAAAGG       | 95  | 131 –144 | QFA, Intermediate, RG1, C3              |
| 3 CUUUUUCUcaaA    | 3   | 333 –346 | KF5M3–5                                 |
| CUUUUUCUCU-A      | 254 | 333 –346 | Intermediate, RG1, Dahlia, AS1, C3      |
| 4 CU-CaaAUCUU-uCu | 3   | 340 –356 | KF5M3–5                                 |
| CU-CU-AUCUU-A-C   | 93  | 340 –356 | Intermediate, RG1, AS1                  |
| CUUCU-AUCUU-A-C   | 1   | 340 –356 | QFA                                     |
| 1+2               | 79  |          |                                         |
| 1+2+3+4           | 3   |          | KF5M3–5                                 |

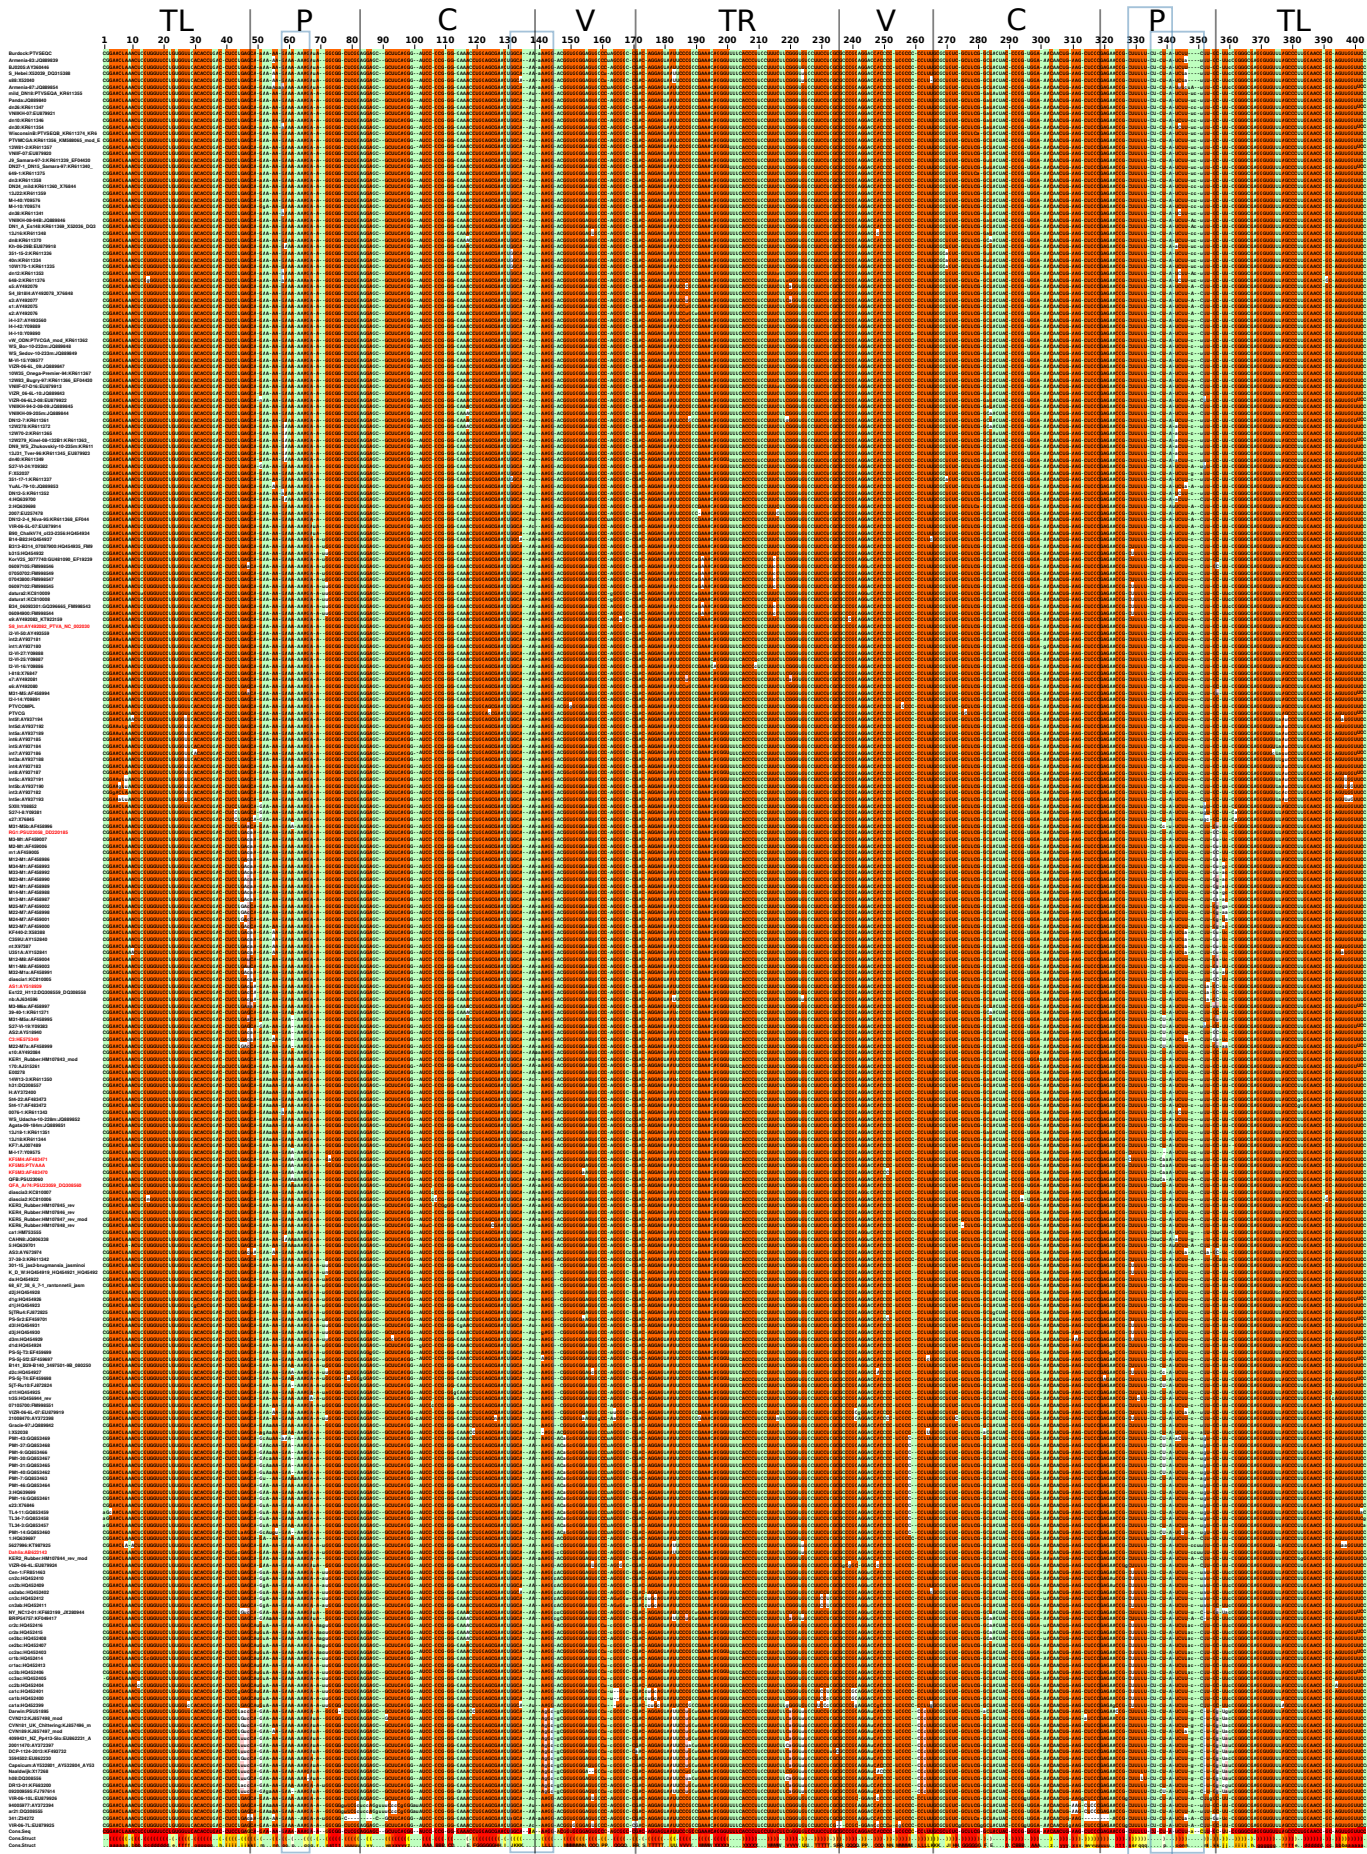



## References

1. Wilm A, Linnenbrink K, Steger G. ConStruct: Improved construction of RNA consensus structures. *BMC Bioinformatics* 2008; 9:219; PMID: [18442401](#); <http://dx.doi.org/10.1186/1471-2105-9-219>.
2. Weinberg Z, Breaker R. R2R—software to speed the depiction of aesthetic consensus RNA secondary structures. *BMC Bioinformatics* 2011; 12:3; PMID: [21205310](#); <http://dx.doi.org/10.1186/1471-2105-12-3>.
3. Keese P, Symons RH. Domains in viroids: evidence of intermolecular RNA rearrangements and their contribution to viroid evolution. *Proc Natl Acad Sci USA* 1985; 82:4582–86; PMID: [3860809](#).
4. Gozmanova M, Denti M, Minkov I, Tsagris M, Tabler M. Characterization of the RNA motif responsible for the specific interaction of potato spindle tuber viroid RNA (PSTVd) and the tomato protein Virp1. *Nucleic Acids Res* 2003; 31:5534–43; PMID: [14500815](#); <http://dx.doi.org/10.1093/nar/gkg777>.
5. Katoh K, Toh H. Improved accuracy of multiple ncRNA alignment by incorporating structural information into a MAFFT-based framework. *BMC Bioinformatics* 2008; 9:212; PMID: [18439255](#); <http://dx.doi.org/http://dx.doi.org/10.1186/1471-2105-9-212>.
